# Supplementary material for: Antibacterial and Cytotoxic Activity of Compounds Isolated fromFlourensia oolepis
Source: Hindawi journal article supplement (doi:10.1155/2015/912484), 2015-01-01
Supplement: f1 [file 912484.f1.pdf]

# **Antibacterial and cytotoxic activity of compounds isolated from**

## ***Flourensia oolepis***

Mariana Belén Joray,<sup>1</sup> Lucas Daniel Trucco,<sup>2</sup> María Laura González,<sup>1</sup> Georgina Natalia Díaz Napal,<sup>1</sup> Sara María Palacios,<sup>1</sup> José Luis Bocco,<sup>2</sup> and María Cecilia Carpinella<sup>1\*</sup>

<sup>1</sup> *Fine Chemicals and Natural Products Laboratory, School of Chemistry, Catholic*

*University of Córdoba, Avda Armada Argentina 3555, X5016DHK Córdoba, Argentina*

<sup>2</sup> *CIBICI CONICET and Department of Clinical Biochemistry, Faculty of Chemical Science,*

*National University of Córdoba, Haya de la Torre and Medina Allende, Córdoba, Argentina*

## **Supplementary Material**

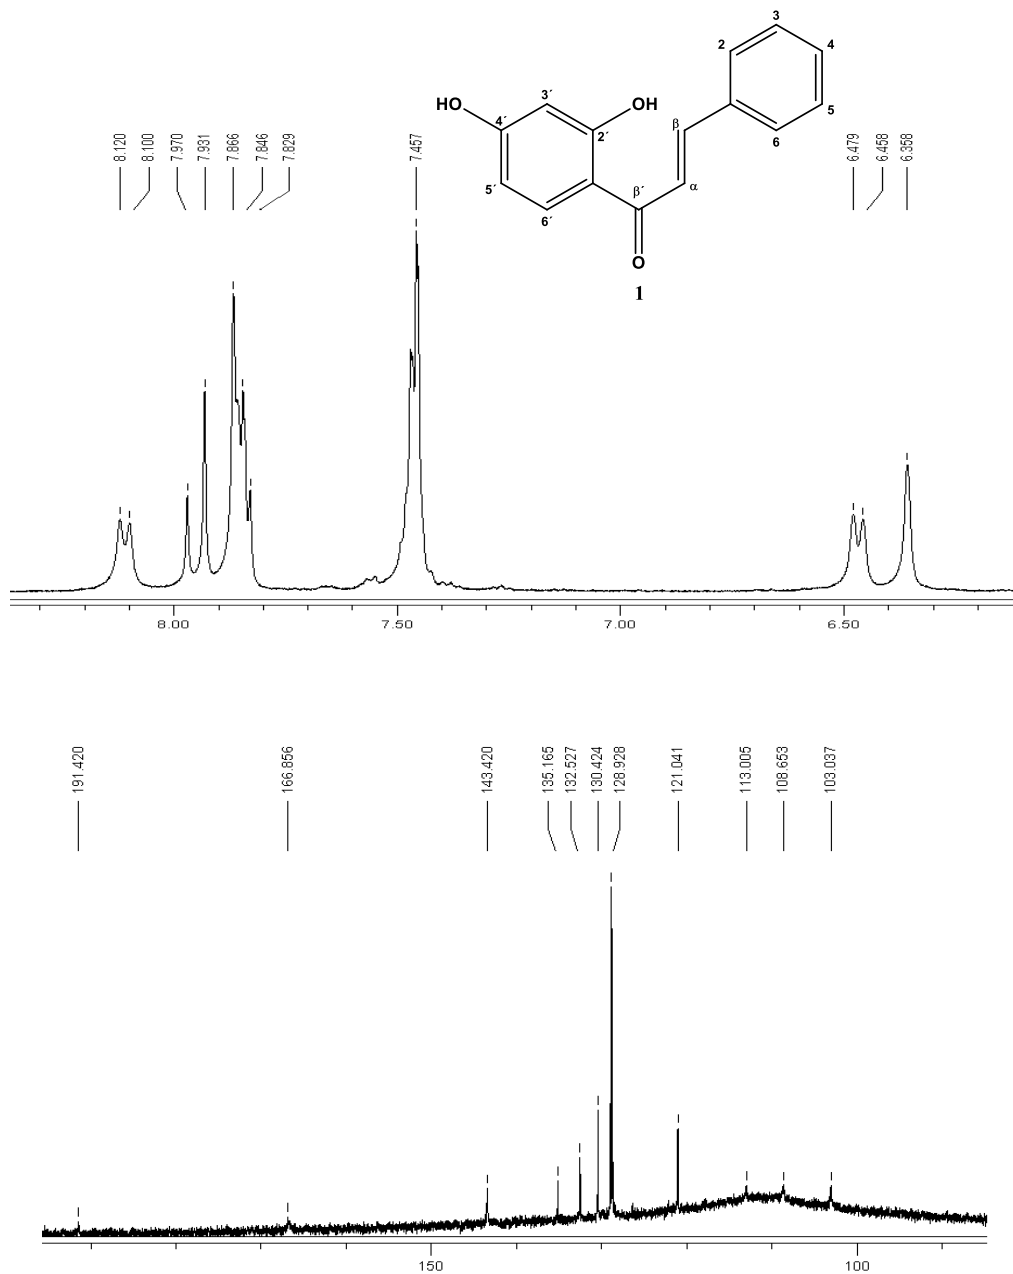

**Figure 1.** NMR spectra of 2',4'-dihydroxychalcone (**1**). <sup>1</sup>H NMR (400 MHz, CD<sub>6</sub>O): δ (ppm) 8.11 (1 H, d, *J*=8.0 Hz, H-6'), 7.95 (1 H, d, *J*=15.6 Hz, H-α), 7.85 (1 H, d, *J*=14.8 Hz, H-β), 7.85-7.45 (5 H, m, H-2-6), 6.47 (1 H, d, *J*=8.4 Hz, H-5'), 6.35 (1 H, s, H-3'). <sup>13</sup>C NMR (50 MHz, CD<sub>6</sub>O): δ (ppm) 103.0 (C-3'); 108.6 (C-5'); 113.0 (C-1'); 121.0 (C-α); 128.9 (C-2,3,5,6); 130.4 (C-4); 132.5 (C-6'); 135.2 (C-1); 143.4 (C-β); 166.8 (C-2',4'); 191.4 (C=O).

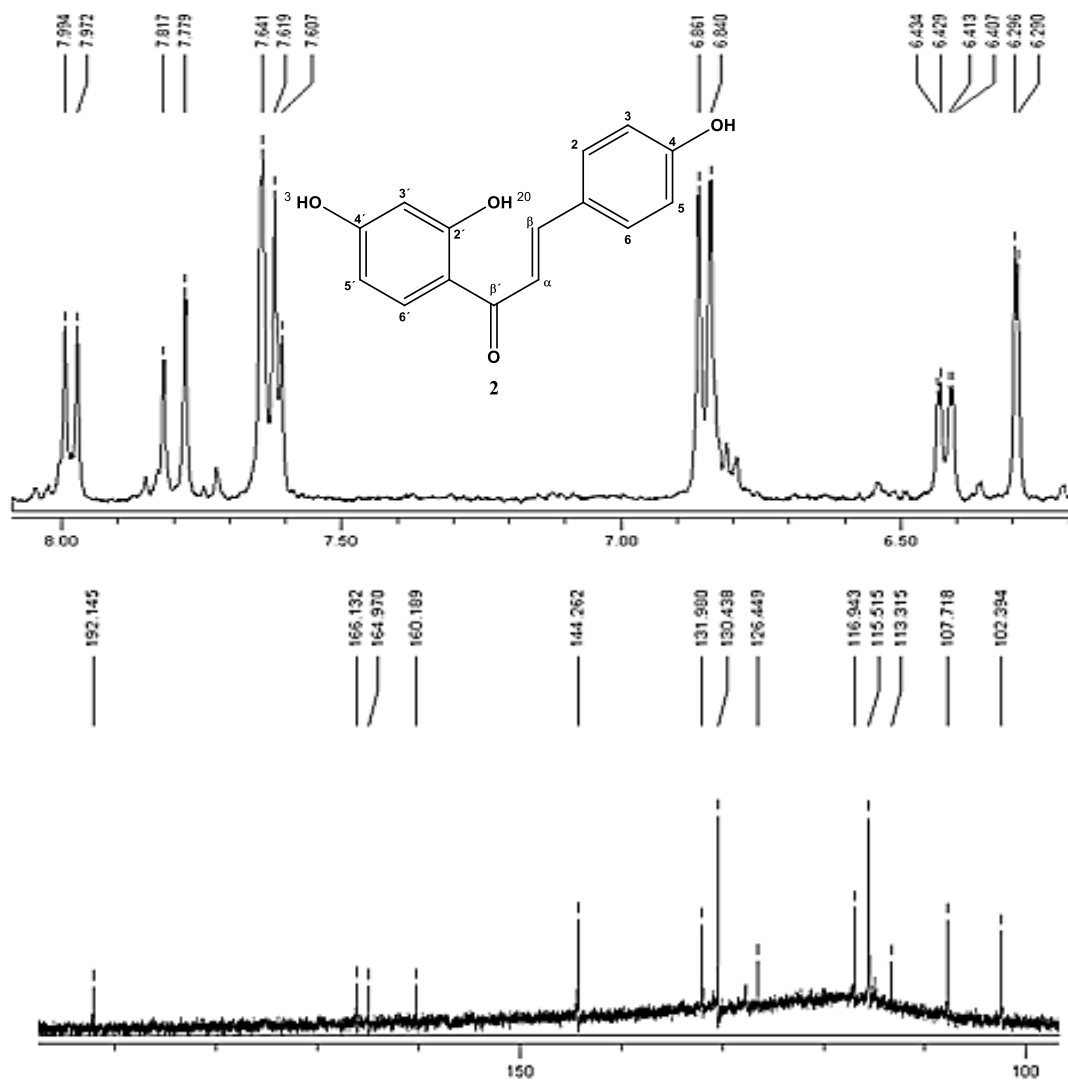

**Figure 2.** NMR spectra of isoliquiritigenin (**2**).  $^1\text{H}$  NMR (400 MHz,  $\text{CD}_6\text{O}$ ):  $\delta$  (ppm) 7.96 (1 H, d,  $J = 8.8$  Hz, H-2'), 7.79 (1 H, d,  $J = 15.2$  Hz, H- $\beta$ ), 7.63 (2 H, d,  $J = 9.2$  Hz, H-2, H-6), 7.62 (1 H, d,  $J = 14.8$  Hz, H- $\alpha$ ), 6.85 (2 H, d,  $J = 8.8$  Hz, H-3, H-5), 6.42 (1 H, dd,  $J = 8.8, 2.4$  Hz, H-3'), 6.29 (1 H, d,  $J = 2.4$  Hz, H-5').  $^{13}\text{C}$  NMR (50 MHz,  $\text{CD}_6\text{O}$ ):  $\delta$  (ppm) 102.4 (C-5'), 107.7 (C-3'), 113.3 (C-1'), 115.2 (C-3, 5), 116.9 (C- $\alpha$ ), 126.4 (C-1), 130.4 (C-2, 6), 131.9 (C-2'), 144.3 (C- $\beta$ ), 160.2 (C-4), 164.9 (C-4'), 166.1 (C-6'), 192.1 (C=O).

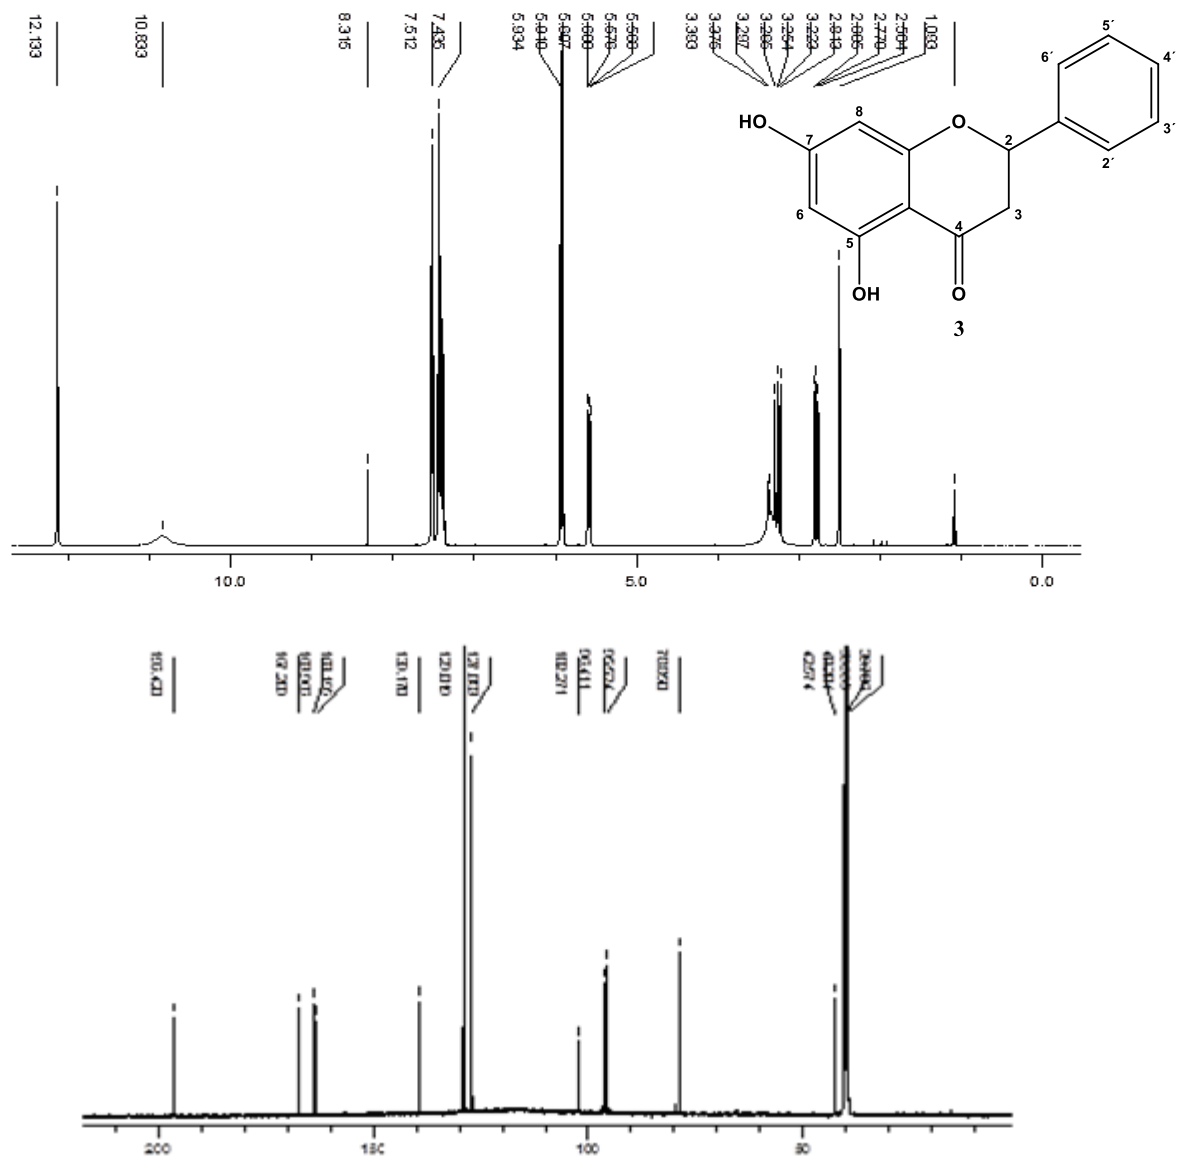

**Figure 3.** NMR spectra of pinocembrin (**3**). <sup>1</sup>H NMR (400 MHz, DMSO-d<sub>6</sub>): δ (ppm) 7.41 (5H, m, H-20-60), 6.01 (1H, d, *J* = 2.2 Hz, H-8), 5.52 (1H, d, *J* = 2.2 Hz, H-6), 5.44 (1H, dd, *J* = 12.8, 3.2 Hz, H-2), 3.06 (1H, dd, *J* = 12.8, 17.2 Hz, H-3ax), 2.77 (1H, dd, *J* = 17.2, 3.2 Hz, H-3eq). <sup>13</sup>C NMR (50 MHz, DMSO-d<sub>6</sub>): δ (ppm) 40.4 (C-3), 80.2 (C-2), 95.9 (C-8), 96.8 (C-6), 102.7 (C-10), 127.5 (C-20/60), 129.4 (C-40) 129.5 (C-30/50), 139.6 (C-10), 163.6 (C-9), 164.4 (C-5), 167.6 (C-7), 196.7 (C-4).

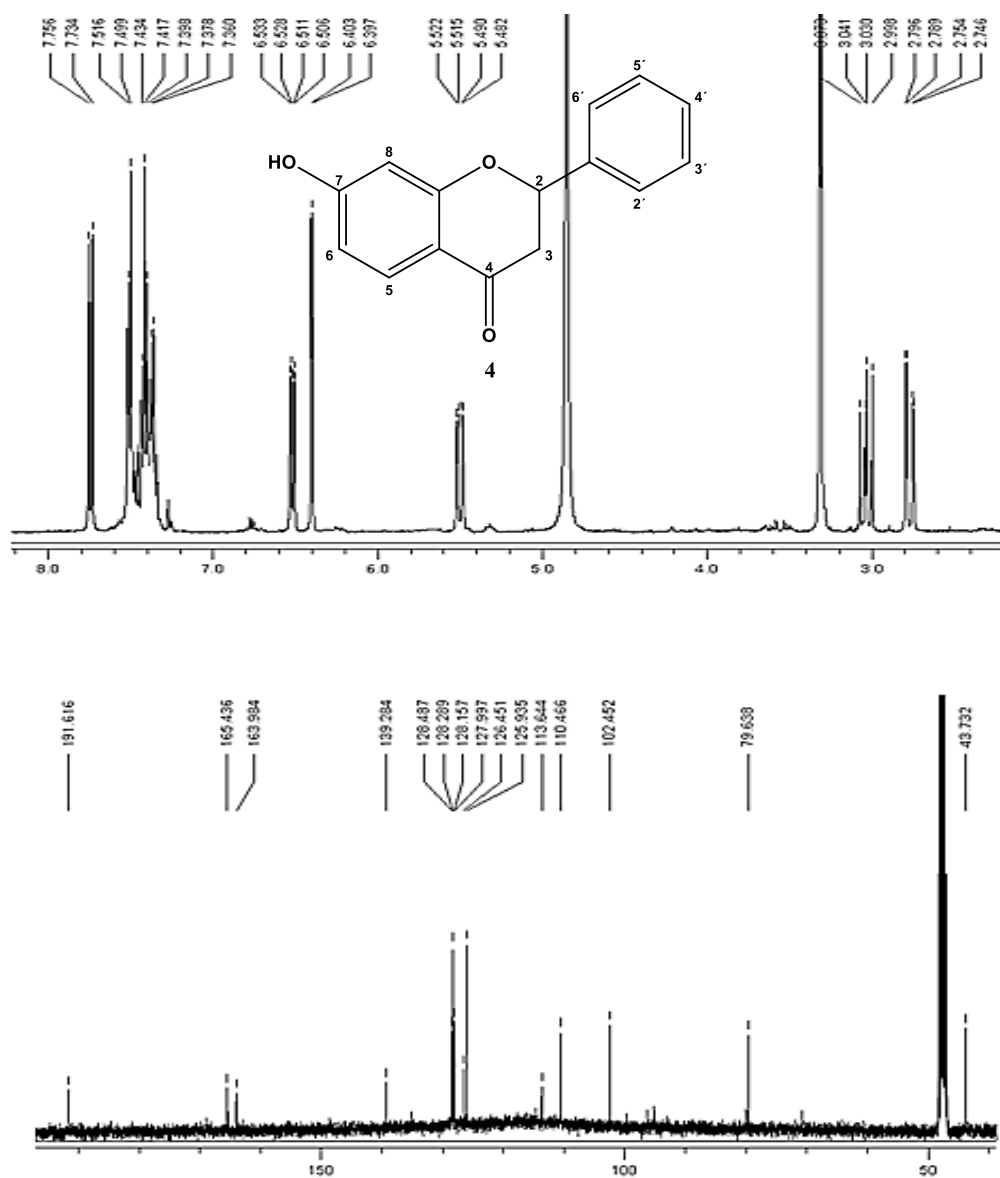

**Figure 4.** NMR spectra of 7-hydroxyflavanone (**4**).  $^1\text{H}$  NMR (400 MHz,  $\text{CD}_6\text{O}$ ):  $\delta$  (ppm) 7.74 (1 H, d,  $J = 8.8$  Hz, H-5), 7.50 (2 H, d,  $J = 6.8$  Hz, H-2', H-6'), 7.42 (2 H, t,  $J = 7.2$  Hz, H-3', H-5'), 7.36 (1 H, t,  $J = 7.2$  Hz, H-4'), 6.52 (1 H, dd,  $J = 8.8, 2.0$  Hz, H-6), 6.40 (1 H, d,  $J = 2.4$  Hz, H-8), 5.50 (1 H, dd,  $J = 12.8, 2.8$  Hz, H-2), 3.03 (1 H, dd,  $J = 17.2, 12.8$  Hz, H-3ax), 2.79 (1 H, dd,  $J = 16.8, 3.0$  Hz, H-3eq).  $^{13}\text{C}$  NMR (50 MHz,  $\text{CD}_6\text{O}$ ):  $\delta$  (ppm) 43.7 (C-3), 79.6 (C-2), 102.4 (C-8), 110.5 (C-6), 113.4 (C-10), 125.9 (C-2'), 126.4 (C-6'), 128 (C-4'), 128.2 (C-3'), 128.3 (C-5'), 128.4 (C-5), 139.3 (C-1'), 163.3 (C-7), 165.4 (C-9), 191.6 (C=O).

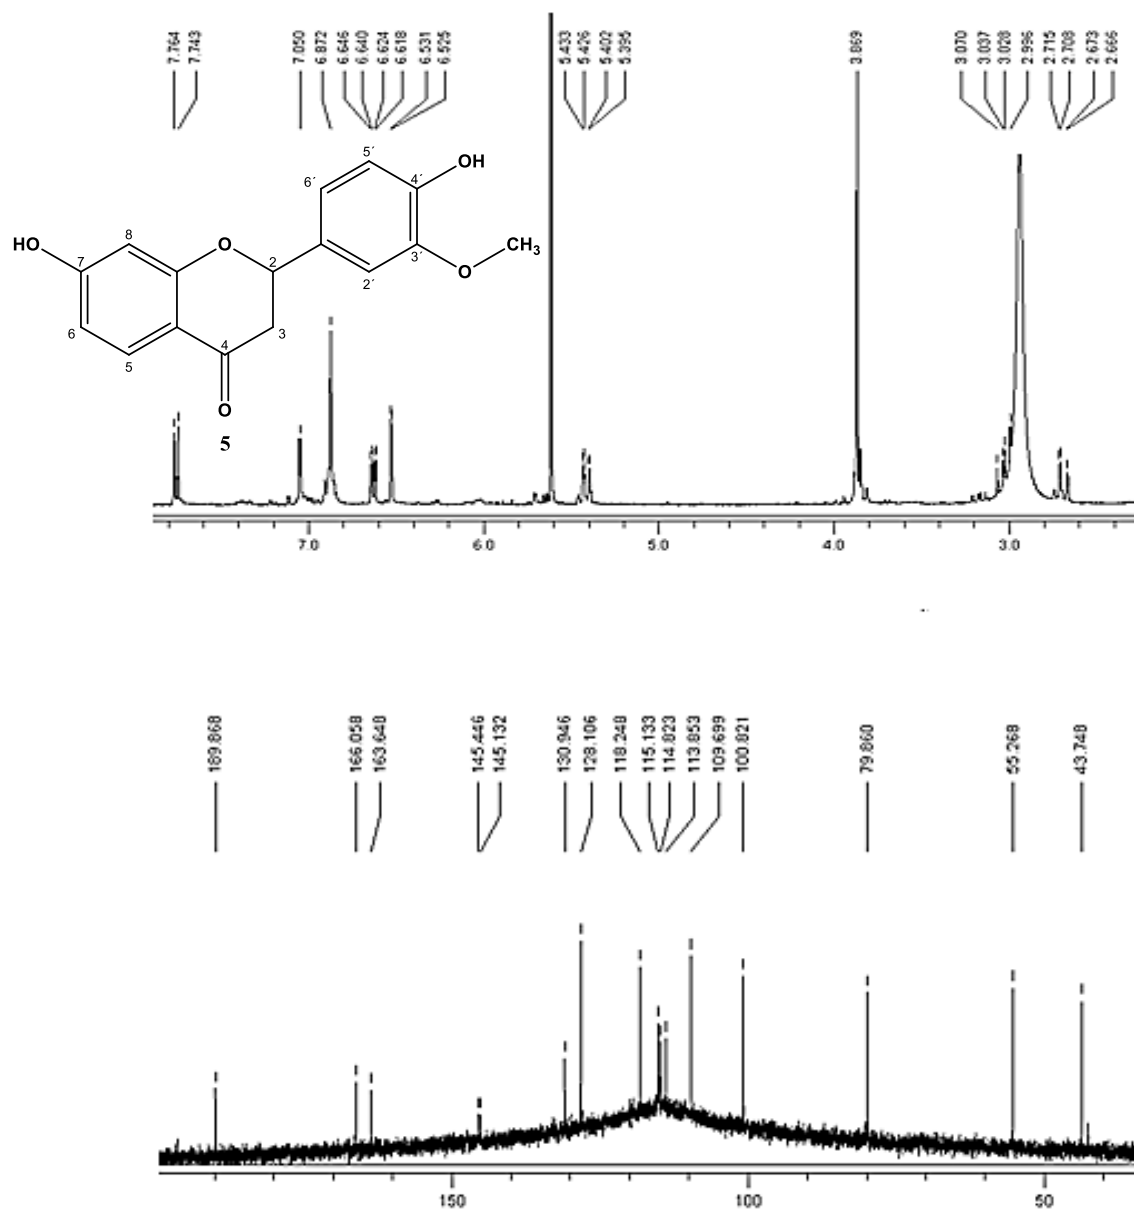

**Figure 5.** NMR spectra of 7,4'-dihydroxy-3'-methoxyflavanone (**5**).  $^1\text{H}$  NMR (400 MHz,  $\text{CD}_6\text{O}$ ):  $\delta$  (ppm) 7.75 (1 H, d,  $J = 8.4$  Hz, H-5), 7.05 (1 H, s, H-2'), 6.88 (1 H, d,  $J = 7.6$  Hz, H-5'), 6.88 (1 H, dd,  $J = 12.8, 5.2$  Hz, H-6'), 6.64 (1 H, dd,  $J = 9.2, 2.8$  Hz, H-6), 6.53 (1 H, d,  $J = 2.4$  Hz, H-8), 5.41 (1 H, dd,  $J = 12.4, 2.8$  Hz, H-2), 3.87 (3 H, s, O- $\text{CH}_3$ ), 3.03 (1 H, dd,  $J = 16.6, 12.8$  Hz, H-3 $_{\text{ax}}$ ), 2.69 (1 H, dd,  $J = 16.8, 2.8$  Hz, H-3 $_{\text{eq}}$ ).  $^{13}\text{C}$  NMR (50 MHz,  $\text{CD}_6\text{O}$ ):  $\delta$  (ppm) 43.8 (C-3), 55.3 (O- $\text{CH}_3$ ), 79.8 (C-2), 100.8 (C-8), 109.7 (C-6), 113.8 (C-2'), 114.8 (C-10), 115.1 (C-5'), 118.2 (C-6'), 128.1 (C-5), 130.9 (C-1'), 145.1 (C-4'), 145.4 (C-3'), 163.6 (C-9), 166.0 (C-7), 189.9 (C=O).
